# Supplementary material
Source: PubMed Central journal article supplement (PMC5363668)
Supplement: Carbonell_et_al_Supplementary_Data_492.pdf [file Carbonell_et_al_Supplementary_Data_492.pdf]

## Supplementary Figures

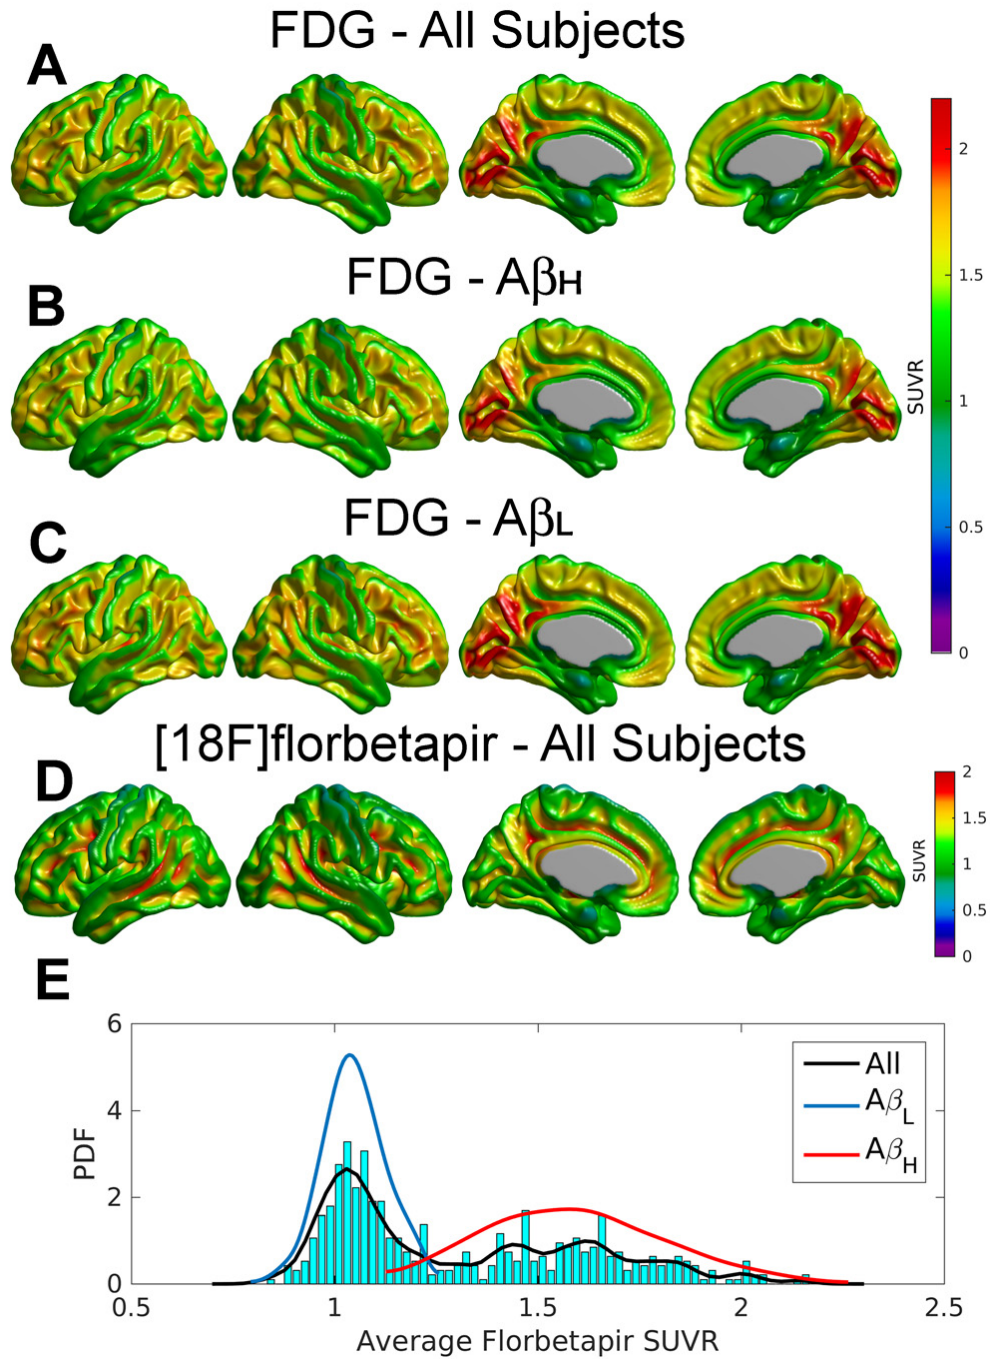

**Supplementary Figure 1.** (A, B, C) Average [18]FDG SUVR maps for all subjects,  $A\beta_H$ , and  $A\beta_L$  groups, respectively. (D) Average [18]florbetapir SUVR map for all subjects. (E) Distribution of the [18]florbetapir SUVR<sub>ROI</sub> across the whole sample, as well as estimation of the probability distribution functions (PDFs) for the  $A\beta_L$  and  $A\beta_H$  groups.

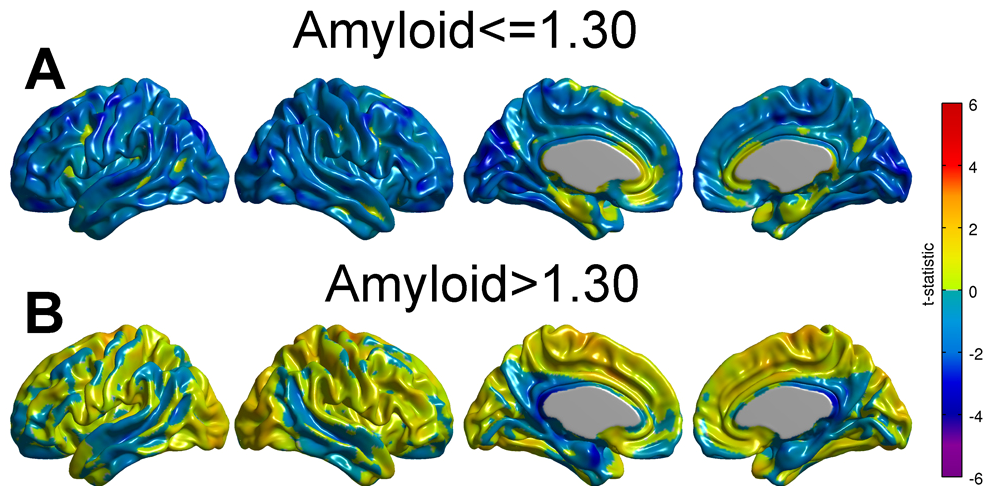

**Supplementary Figure 2.** Statistical significance of the relationship between  $\beta$ -amyloid burden and glucose metabolism for Amyloid  $\leq 1.30$  and Amyloid  $> 1.30$ , respectively. The SUVR cutoff value of 1.30 shows two different patterns.

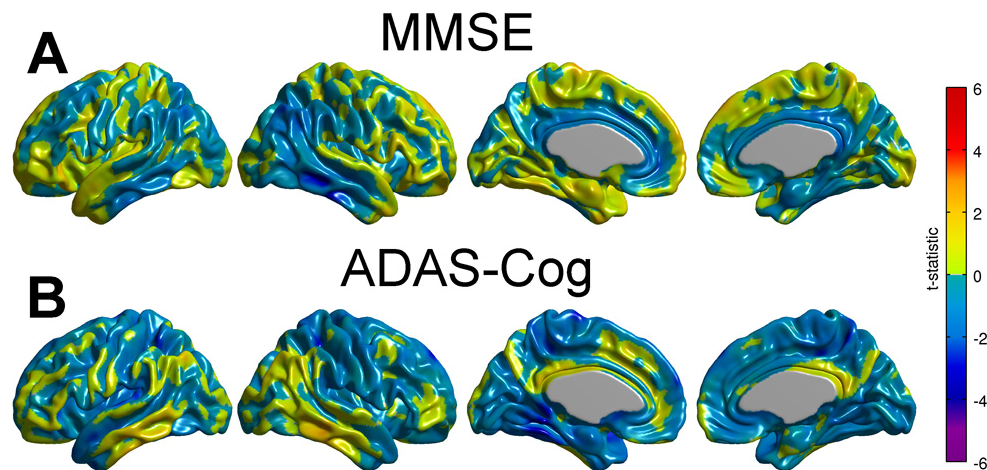

**Supplementary Figure 3.** Relationship between glucose metabolism and  $\beta$ -amyloid burden modulated by MMSE and ADAD-Cog. Multiple comparisons thresholding of these t-statistic parametric maps using FDR at 0.05 did not show any regions of statistical significance that would support a strong modulation effect.

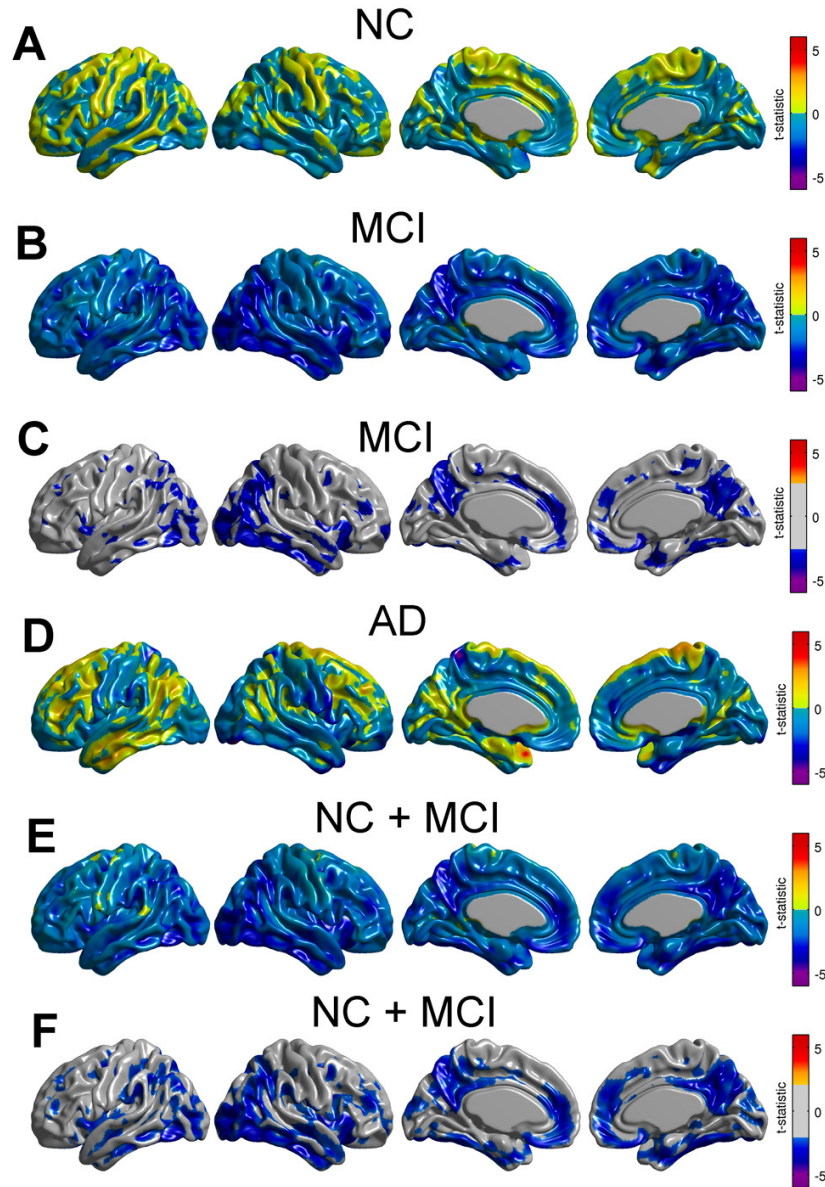

**Supplementary Figure 4.** Significance of APOE  $\epsilon 4$  status on metabolism corresponding to NC, MCI, AD subjects and combined NC/MCI cohort. Results (A, B, D, and E) are shown without thresholding. A statistically-significant main effect of genotype was only found for MCI subjects (B,C) and the NC/MCI cohort (E,F). Results (C) and (F) are shown at an FDR-corrected threshold of 0.05.

## **Acknowledgements**

Data collection and sharing for this project was funded by the Alzheimer's Disease Neuroimaging Initiative (ADNI) (National Institutes of Health Grant U01 AG024904) and DOD ADNI (Department of Defense award number W81XWH-12-2-0012). Additional information can be found at <http://jcbfm.sagepub.com/content/by/supplemental-data>. ADNI is funded by the National Institute on Aging, the National Institute of Biomedical Imaging and Bioengineering, and through generous contributions from the following: AbbVie, Alzheimer's Association; Alzheimer's Drug Discovery Foundation; Araclon Biotech; BioClinica, Inc.; Biogen; Bristol Myers Squibb Company; CereSpir, Inc.; Eisai Inc.; Elan Pharmaceuticals, Inc.; Eli Lilly and Company; EuroImmun; F. Hoffmann-La Roche Ltd and its affiliated company Genentech, Inc.; Fujirebio; GE Healthcare; IXICO Ltd.; Janssen Alzheimer Immunotherapy Research & Development, LLC.; Johnson & Johnson Pharmaceutical Research & Development LLC.; Lumosity; Lundbeck; Merck & Co., Inc.; Meso Scale Diagnostics, LLC.; NeuroRx Research; Neurotrack Technologies; Novartis Pharmaceuticals Corporation; Pfizer Inc.; Piramal Imaging; Servier; Takeda Pharmaceutical Company; and Transition Therapeutics. The Canadian Institutes of Health Research is providing funds to support ADNI clinical sites in Canada. Private sector contributions are facilitated by the Foundation for the National Institutes of Health ([www.fnih.org](http://www.fnih.org)). The grantee organization is the Northern California Institute for Research and Education, and the study is coordinated by the Alzheimer's Disease Cooperative Study at the University of California, San Diego. ADNI data are disseminated by the Laboratory for Neuro Imaging at the University of Southern California.
